# Supplementary material
Source: PubMed Central journal article supplement (PMC4127066)
Supplement: NIHMS586273-supplement-1.pdf [file NIHMS586273-supplement-1.pdf]

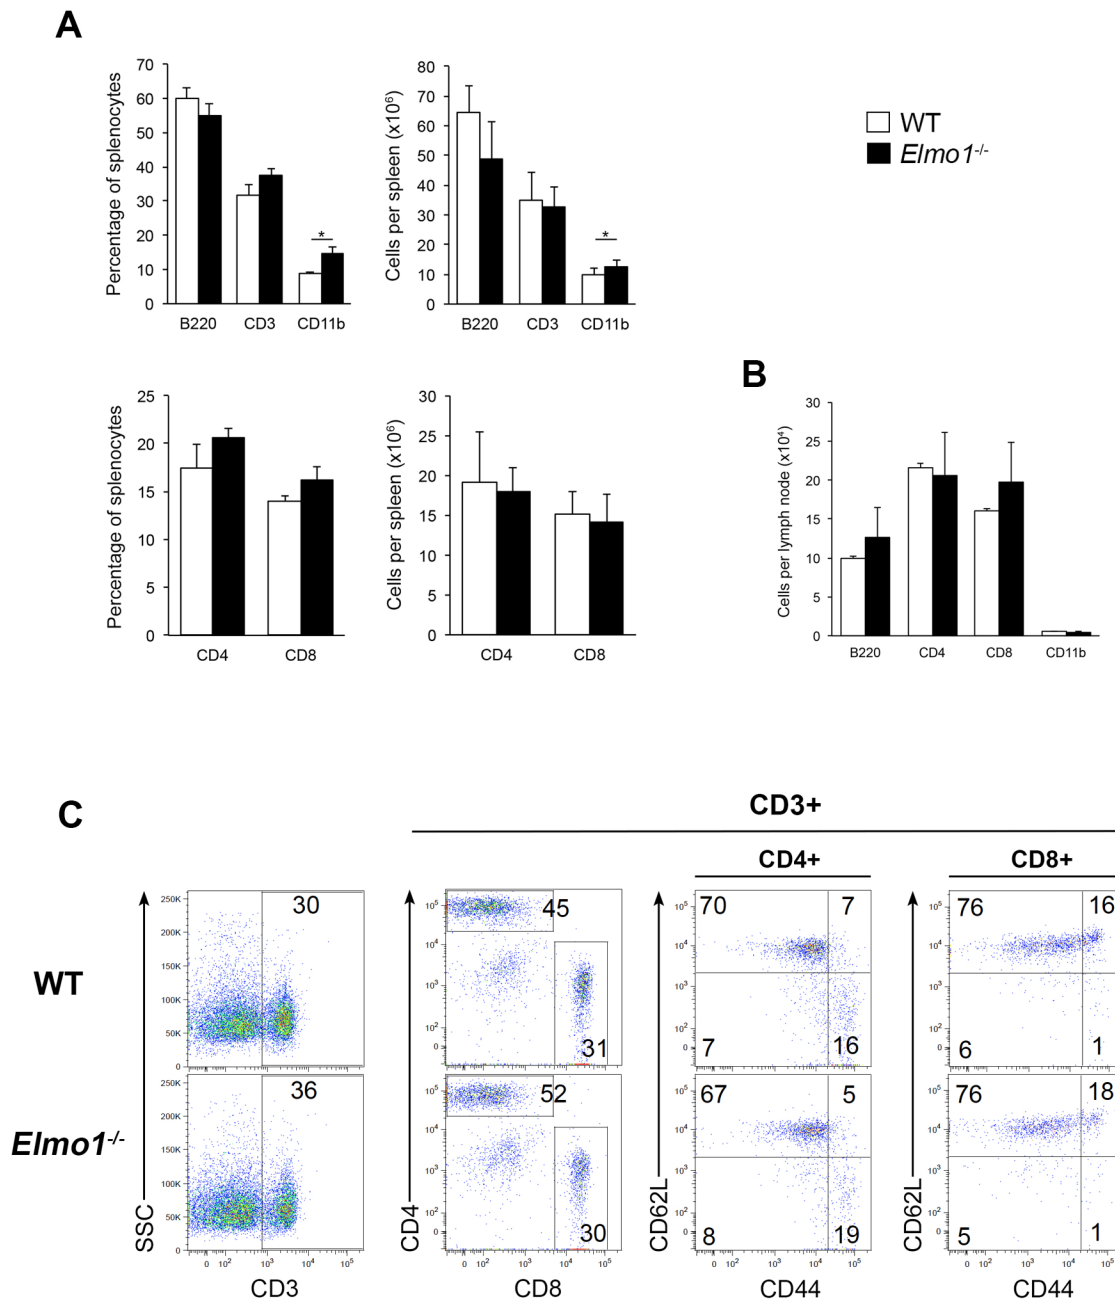

**Supplemental Figure 1. Lymphoid populations in *Elmo1*<sup>-/-</sup> mice.** Flow cytometry analysis of spleen (A) and lymph node (B) populations of WT and *Elmo1*<sup>-/-</sup> mice. The average total number and percentage of each cell population for 3-5 mice/genotype is shown  $\pm$ SEM. C) Splenocytes from WT and *Elmo1*<sup>-/-</sup> mice were analyzed by flow cytometry using antibodies against the indicated antigens. Data shown are representative of at least 3 mice per genotype.

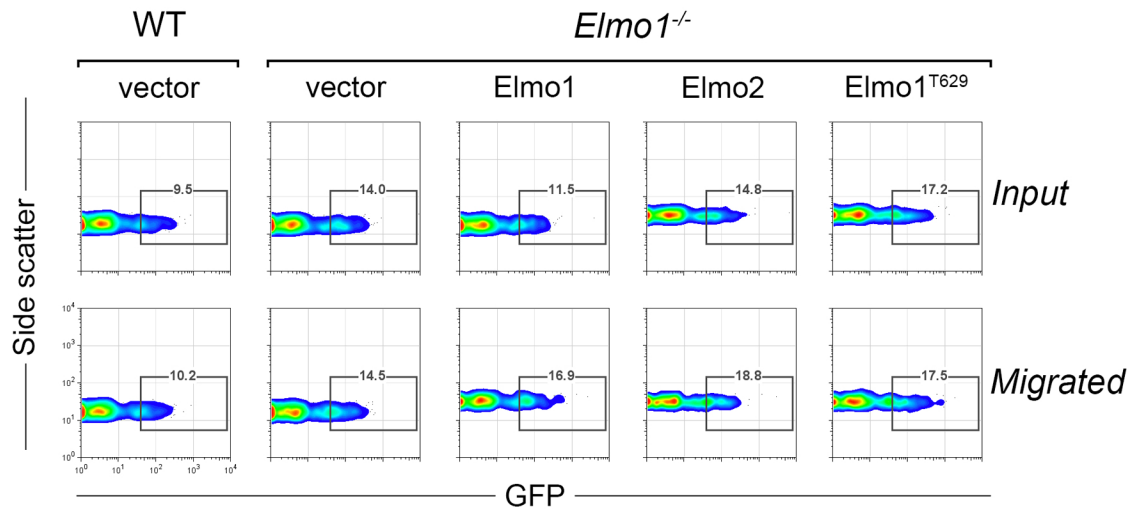

**Supplemental Figure 2. Ectopic expression of Elmo constructs in primary T cells.** Splenic CD4 cells from WT and *Elmo1*<sup>-/-</sup> mice were co-transfected with 4 $\mu$ g of the indicated plasmids plus 1 $\mu$ g pMax-GFP. 18 hours later, total cells (input, *top row*) and cells that migrated to 50ng/mL CXCL12 in the lower chamber of a trans-well (migrated, *bottom row*) were determined by flow cytometry. Number in gate indicates percentage of GFP<sup>+</sup> cells among all live cells. One representative experiment of three is shown.

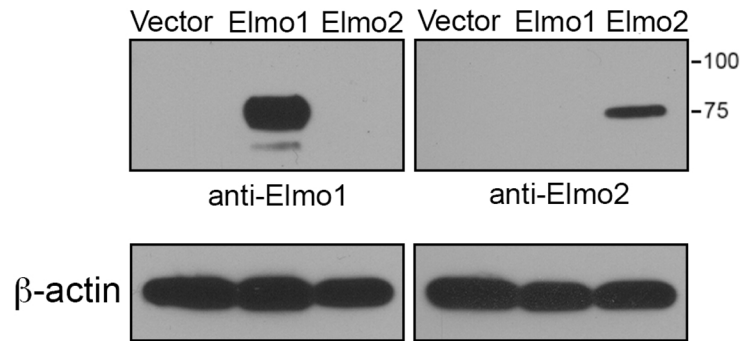

**Supplemental Figure 3. Specificity of Elmo1 and Elmo2 antibodies used in this study.** Lysates from 293T cells transfected with indicated plasmids were analyzed by immunoblotting with anti-Elmo1 or anti-Elmo2. Relative molecular weights (kDa) indicated to right.
