# Supplementary material
Source: PubMed Central journal article supplement (PMC4127066)
Supplement: NIHMS586273-supplement-2.pdf [file NIHMS586273-supplement-2.pdf]

**Supplemental Video 1. Defective motility of *Elmo1*<sup>-/-</sup> T cells on CCL21.** Video of CD4<sup>+</sup> splenocytes from WT (green) and *Elmo1*<sup>-/-</sup> (red) mice plated on ICAM-1 plus CCL21. Boxed area shows area of field shown in Figure 2 still images.

**Supplemental Video 2. Defective motility of *Elmo1*<sup>-/-</sup> T cells on CXCL12.** Video of CD4<sup>+</sup> splenocytes from WT (green) and *Elmo1*<sup>-/-</sup> (red) mice plated on ICAM-1 plus CXCL12.
